# Supplementary material for: Transient activation of fission yeast AMPK is required for cell proliferation during osmotic stress
Source: PubMed Central journal article supplement — Mol Biol Cell. 2017 Jul 1;28(13):1804–14. doi: 10.1091/mbc.E17-04-0235 (PMC5491188; doi:10.1091/mbc.e17-04-0235), 2017-07-01
Supplement: supp_E17-04-0235v1_CombinedSupMats.pdf [file supp_E17-04-0235v1_CombinedSupMats.pdf]

# Supplemental Materials

*Molecular Biology of the Cell*

Schutt and Moseley
